# Supplementary material for: Experiences of coping with the first wave of COVID-19 epidemic in Philadelphia, PA: Mixed methods analysis of a cross-sectional survey of worries and symptoms of mood disorders
Source: PLOS journal article supplement (doi:10.1371/journal.pone.0258213), 2021-10-04
Supplement: S1 (10.1371/journal.pone.0258213.s001) [file journal.pone.0258213.s001]

Table S1: Demographics of participants who did not report employment at start of the epidemic (see Table 1 for definitions of abbreviations)

| Health and demongraphics                                            |                               | Did not have a job at start of epidemic<br>(n=369) |           |    |      |     |            |    |      |     |  |
|---------------------------------------------------------------------|-------------------------------|----------------------------------------------------|-----------|----|------|-----|------------|----|------|-----|--|
|                                                                     |                               | Total<br>N                                         | Anxiety   |    | mean | sd  | Depression |    |      |     |  |
|                                                                     |                               |                                                    | case<br>N | %  |      |     | case<br>N  | %  | mean | sd  |  |
|                                                                     |                               |                                                    |           |    |      |     |            |    |      |     |  |
| Demographics                                                        |                               |                                                    |           |    |      |     |            |    |      |     |  |
| Gender                                                              | Female                        | 275                                                | 84        | 31 | 8.9  | 4.3 | 33         | 12 | 6.2  | 3.9 |  |
|                                                                     | Male                          | 88                                                 | 22        | 25 | 7.4  | 4.4 | 14         | 16 | 5.7  | 4.4 |  |
|                                                                     | Other                         | 6                                                  | 3         | 50 | 13.2 | 5.1 | 2          | 33 | 9.5  | 3.7 |  |
| Race                                                                | White                         | 323                                                | 97        | 30 | 8.7  | 4.4 | 43         | 13 | 6.2  | 4   |  |
|                                                                     | Black or African American     | 21                                                 | 3         | 14 | 6.2  | 3.6 | 0          | 0  | 4.7  | 2.8 |  |
|                                                                     | Other                         | 25                                                 | 9         | 36 | 8.9  | 4.6 | 6          | 24 | 7    | 5.1 |  |
| Age (years)                                                         | <35                           | 26                                                 | 14        | 54 | 11.3 | 4.9 | 7          | 27 | 7.5  | 4.6 |  |
|                                                                     | 35-54                         | 73                                                 | 36        | 48 | 10.8 | 4.7 | 18         | 25 | 7.8  | 4.5 |  |
|                                                                     | 55+                           | 270                                                | 60        | 22 | 7.7  | 3.9 | 24         | 9  | 5.6  | 3.7 |  |
| Personal income in 2019                                             | <40,000                       | 124                                                | 53        | 43 | 9.9  | 4.9 | 26         | 21 | 7.3  | 4.4 |  |
|                                                                     | 40,000-<100,000               | 140                                                | 34        | 24 | 8.2  | 4   | 16         | 11 | 5.8  | 3.8 |  |
|                                                                     | 100,000+                      | 86                                                 | 15        | 17 | 7.4  | 3.6 | 4          | 5  | 5.2  | 3.6 |  |
|                                                                     | missing                       | 19                                                 | 7         | 37 | 8.6  | 5   | 3          | 16 | 5.9  | 4.3 |  |
| Education                                                           | college degree                | 272                                                | 72        | 26 | 8.4  | 4.1 | 36         | 13 | 6.1  | 4   |  |
|                                                                     | no college degree             | 94                                                 | 37        | 39 | 9.2  | 5.1 | 13         | 14 | 6.6  | 4.3 |  |
|                                                                     | missing                       | 3                                                  | 0         | 0  | 3.3  | 3.1 | 0          | 0  | 1.3  | 0.6 |  |
| Marital status                                                      | Married, or living as married | 208                                                | 64        | 31 | 8.8  | 4.2 | 25         | 12 | 6.0  | 4.0 |  |
|                                                                     | Single                        | 79                                                 | 29        | 37 | 9    | 5.3 | 16         | 20 | 6.8  | 4.7 |  |
|                                                                     | Widowed, divorced             | 81                                                 | 16        | 20 | 7.7  | 3.8 | 8          | 10 | 5.9  | 3.5 |  |
|                                                                     | missing                       | 1                                                  | 0         | 0  |      |     | 0          | 0  |      |     |  |
| Children <18 years living in your household                         | Yes                           | 54                                                 | 22        | 41 | 9.7  | 4.8 | 12         | 22 | 7.1  | 4.5 |  |
|                                                                     | No                            | 315                                                | 87        | 28 | 8.4  | 4.3 | 37         | 12 | 6.0  | 4.0 |  |
|                                                                     | missing                       | 0                                                  |           |    |      |     |            |    |      |     |  |
| Health                                                              |                               |                                                    |           |    |      |     |            |    |      |     |  |
| Were unwell for two or more consecutive days?                       | Yes                           | 79                                                 | 33        | 42 | 9.8  | 4.1 | 13         | 16 | 7.1  | 3.6 |  |
|                                                                     | No                            | 288                                                | 75        | 26 | 8.3  | 4.4 | 35         | 12 | 5.9  | 4.2 |  |
|                                                                     | missing                       | 2                                                  | 1         | 50 | 9.0  | 7.1 | 1          | 50 | 8.5  | 4.9 |  |
| Believe infected                                                    | Yes                           | 3                                                  | 1         | 33 | 8.3  | 4.2 | 2          | 67 | 10.3 | 2.1 |  |
|                                                                     | No                            | 31                                                 | 14        | 45 | 10.9 | 4.0 | 11         | 35 | 8.5  | 5.1 |  |
|                                                                     | maybe                         | 10                                                 | 7         | 70 | 11.5 | 4.6 | 3          | 30 | 8.7  | 3.8 |  |
|                                                                     | missing                       | 325                                                | 87        | 27 | 8.3  | 4.3 | 33         | 10 | 5.8  | 3.9 |  |
| COVID-19 diagnosis                                                  | Reported                      |                                                    |           |    |      |     |            |    |      |     |  |
|                                                                     | Not reported                  |                                                    |           |    |      |     |            |    |      |     |  |
| Self-rated health compared to others                                | good to excellent             | 317                                                | 81        | 26 | 8.2  | 4.2 | 34         | 11 | 5.9  | 4.0 |  |
|                                                                     | poor or fair                  | 52                                                 | 28        | 54 | 11.2 | 4.7 | 15         | 29 | 8.1  | 4.1 |  |
| Self-rated health                                                   | good to excellent             | 327                                                | 90        | 28 | 8.3  | 4.3 | 40         | 12 | 6.0  | 4.1 |  |
|                                                                     | poor or fair                  | 42                                                 | 19        | 45 | 10.7 | 4.6 | 9          | 21 | 7.4  | 4.0 |  |
| Upset by experience people trying to avoid you in the public places |                               |                                                    |           |    |      |     |            |    |      |     |  |
|                                                                     | Yes                           | 23                                                 | 8         | 35 | 9.8  | 4.0 | 5          | 22 | 8.2  | 4.2 |  |
|                                                                     | No                            | 232                                                | 67        | 29 | 8.6  | 4.3 | 29         | 13 | 6.0  | 4.0 |  |
|                                                                     | Do not want to answer         | 3                                                  | 2         | 67 | 9.7  | 9.1 | 0          | 0  | 5.7  | 3.2 |  |
|                                                                     | Maybe avoided by other        | 69                                                 | 21        | 30 | 9.0  | 4.4 | 9          | 13 | 6.6  | 4.0 |  |
|                                                                     | Did not experience            | 105                                                | 31        | 30 | 8.3  | 4.6 | 15         | 14 | 6.2  | 4.3 |  |
| Phase of restrictions during interview                              | Most restrictive (early)      | 179                                                | 46        | 26 | 8.0  | 4.3 | 20         | 11 | 5.5  | 4.2 |  |
|                                                                     | Restrictions relaxed (late)   | 190                                                | 63        | 33 | 9.2  | 4.4 | 29         | 15 | 6.8  | 3.8 |  |
